# Supplementary material
Source: publisher site journal article supplement (https://www.dovepress.com/article/274757)
Supplement: Supplementary file 1 [file get_supplementary_file.php]

**Supplementary Figure 1.** 15-item Survey used in this study.

There is mounting evidence that medical students are under pressure to obtain PubMed-indexed publications during their undergraduate training. The Foundation School application awards up to two additional points to final year students who are named authors on PubMed-indexed publications. We would appreciate it if you could fill in this survey which will hopefully provide us motivational factors and opinions regarding the pursuit of PubMed-indexed publications. It is estimated this survey will take 3-5 minutes to complete. If you would like any further information please contact Chloe Hobbis or Ellie Burleigh (chobbis1@sheffield.ac.uk, eburleigh1@sheffield.ac.uk).

Many thanks in advance for your help.

1. How many PubMed-indexed publications do you have?

0, 1, 2, 3-5, 6-10

1. I had an undergraduate degree prior to medical school entry.

Yes, No

1. I undertook an intercalated degree during medical school.

Yes, No

1. I was aware of the points allocated for PubMed-indexed publications for Foundation School application.

Yes, No

1. I felt under pressure to achieve PubMed-indexed publications during medical school.

Strongly agree, agree, neutral, disagree, strongly disagree

1. Please select the option you feel best applies to your motivation regarding PubMed-indexed publications.

Strongly agree, agree, neutral, disagree, strongly disagree

1. Obtaining additional points for my Foundation School application
2. Advancing my medical knowledge
3. Pursuing an academic career
4. Increasing my competitiveness for future specialty training
5. Providing a platform to share knowledge with others
6. For the current Foundation School application, 1 point is allocated per PubMed-indexed publication (maximum 2), regardless of authorship position or ‘type’ of publication. Please select the option you feel best applies to the statements below.

Strongly agree, agree, neutral, disagree, strongly disagree

1. I feel that points should reflect on position of authorship
2. I feel that points should reflect on the type of publication (original research, systematic review/ meta-analysis, case report, letters)
3. My medical school provided adequate training for me to achieve PubMed-indexed publications.

Strongly agree, agree, neutral, disagree, strongly disagree

1. My medical school provided adequate opportunities for me to achieve PubMed-indexed publications?

Strongly agree, agree, neutral, disagree, strongly disagree

1. Any other comments regarding PubMed pressure amongst medical students:
